# Supplementary material for: Phase 1/2 study evaluating the safety and efficacy of DSP‐7888 dosing emulsion in myelodysplastic syndromes
Source: PubMed Central journal article supplement — Cancer Sci. 2022 Mar 9;113(4):1377–92. doi: 10.1111/cas.15245 (PMC8990724; doi:10.1111/cas.15245), 2022-03-09
Supplement: CAS-113-1377-s001.pdf [file CAS-113-1377-s001.pdf]

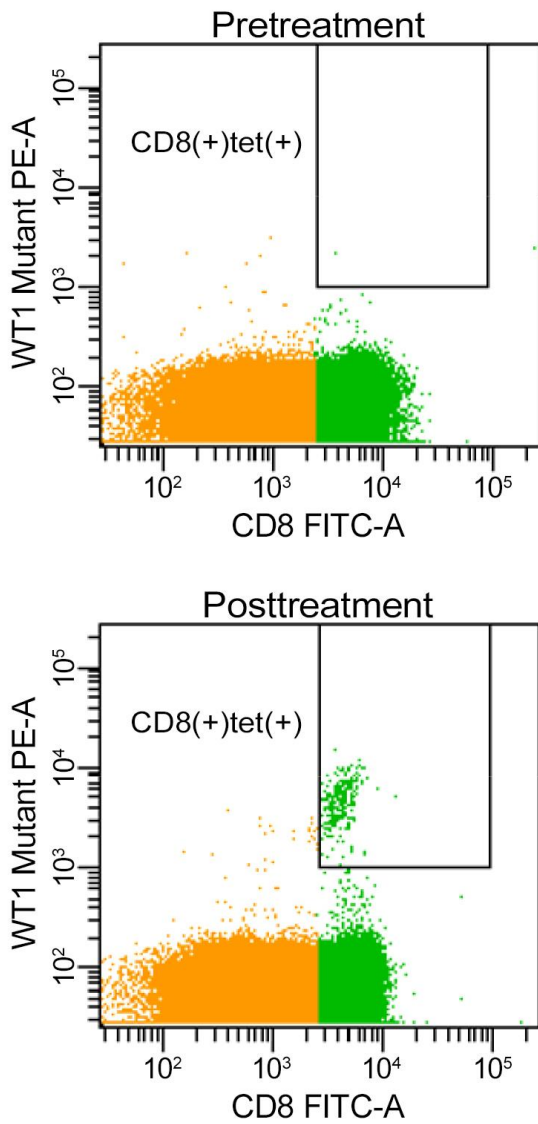

**Figure S1.** WT1 CD8<sup>+</sup> tetramer<sup>+</sup> T cells at baseline and on Day 15 of Cycle 2 in a patient

assessed as WT1 CD8<sup>+</sup> tetramer<sup>+</sup> T cell positive by WT1 tetramer staining

WT1, Wilms' tumor gene 1
